# Supplementary material for: Inhibition of connexin hemichannels alleviates non-alcoholic steatohepatitis in mice
Source: PubMed Central journal article supplement (PMC5557827; doi:10.1038/s41598-017-08583-w), 2017-08-15
Supplement: 41598_2017_8583_MOESM1_ESM.pdf [file 41598_2017_8583_MOESM1_ESM.pdf]

1 **Inhibition of connexin hemichannels alleviates non-alcoholic steatohepatitis**  
2 **in mice**

3  
4 *Joost Willebrords<sup>a,§</sup>, Bruno Cogliati<sup>b,§</sup>, Isabel Veloso Alves Pereira<sup>b</sup>, Tereza Cristina da*  
5 *Silva<sup>b</sup>, Sara Crespo Yanguas<sup>a</sup>, Michaël Maes<sup>a</sup>, Veronica Mollica Govoni<sup>b</sup>, Andressa Lima<sup>b</sup>,*  
6 *Daniele Aparecida Felisbino<sup>b</sup>, Elke Decrock<sup>c</sup>, Marina Sayuri Nogueira<sup>d</sup>, Inar Alves de*  
7 *Castro<sup>d</sup>, Isabelle Leclercq<sup>e</sup>, Luc Leybaert<sup>c</sup>, Robim Marcelino Rodrigues<sup>a</sup> and Mathieu*  
8 *Vinken<sup>a,\*</sup>*

9  
10 <sup>a</sup>Department of *In Vitro* Toxicology and Dermato-Cosmetology, Faculty of Medicine and  
11 Pharmacy, Vrije Universiteit Brussel, Laarbeeklaan 103, 1090 Brussels, Belgium.

12 Joost Willebrords: E-mail: joost.willebrords@vub.ac.be; + Tel: 32 2 477 45 87

13 Sara Crespo Yanguas: E-mail: sara.crespo.yanguas@vub.ac.be; Tel: +32 2 477 45 87

14 Michaël Maes: E-mail: michael.mc.maes@vub.ac.be; Tel: +32 2 477 45 87

15 Robim Marcelino Rodrigues: rmarceli@vub.ac.be; Tel: +32 2 477 45 17

16 Mathieu Vinken: E-mail: mvinken@vub.ac.be; Tel: +32 2 477 45 87

17  
18 <sup>b</sup>Department of Pathology, School of Veterinary Medicine and Animal Science, University of  
19 São Paulo, Av. Prof. Dr. Orlando Marques de Paiva 87, 05508-270, São Paulo, Brazil.

20 Bruno Cogliati E-mail: bcogliati@usp.br; Tel: +55 11 30 91 12 00

21 Isabel Veloso Alves Pereira: isabelveloso@gmail.com; Tel: +55 11 30 91 12 00

22 Tereza Cristina da Silva: terezacs@usp.br; Tel: +55 11 30 91 12 00

23 Veronica Mollica Govoni: veronica.mgovoni@gmail.com; Tel: +55 11 30 91 12 00

24 Andressa Lima: andressalima8282@gmail.com; Tel: +55 11 30 91 12 00

25 Daniele Aparecida Felisbino: dannoz@hotmai.com; Tel: +55 11 30 91 12 00

26 <sup>c</sup>Department of Basic Medical Sciences, Physiology Group, Ghent University, De Pintelaan  
27 185, 9000 Ghent, Belgium

28 Elke Decrock: E-mail: elke.decrock@ugent.be; Tel: +32 9 332 39 73

29 Luc Leybaert: E-mail: luc.leybaert@ugent.be; Tel: +32 9 332 33 66

30

31 <sup>d</sup>Department of Food and Experimental Nutrition, Faculty of Pharmaceutical Sciences,  
32 University of São Paulo, Av. Prof. Lineu Prestes 580, 05508-270 São Paulo, Brazil.

33 Marina Sayuri Nogueira: masayuri.nogueira@gmail.com; Tel: +55 11 30 91 36 30

34 Inar Alves de Castro: inar@usp.br; Tel: +55 11 30 91 36 30

35

36 <sup>e</sup>Laboratory of hepatogastroenterology, Institut de Recherche Expérimentale et clinique,  
37 Université catholique de Louvain, Avenue Mounier 53, 1200 Brussels, Belgium.

38 Isabelle Lecercq: isabelle.leclercq@uclouvain.be, Tel: +32 2 764 52 73

39

40 \$ Equally contributing first authors.

41 \* Corresponding author: Mathieu Vinken, Laarbeeklaan 103, 1090 Brussels, Belgium, E-mail:  
42 mvinken@vub.ac.be, Tel: +32 2 477 45 87.

43

44

45

46

47

48

49

50

51 **Supplementary Method 1. Reverse transcription quantitative real-time polymerase**  
52 **chain reaction.** After RNA extraction, 2 µg RNA was reversely transcribed into cDNA with  
53 an iScript™ cDNA Synthesis Kit (Bio-Rad, USA) using an iCycler iQ™ (Bio-Rad, USA)  
54 followed by cDNA purification using a GenElute™ PCR Clean-Up Kit. cDNA products were  
55 quantitatively amplified using Taqman probes and primers (Applied Biosystems, USA)  
56 targeted toward *Gjal* (Cx43), *Gjb1* (Cx32) and *Gjb2* (Cx26) and candidate reference genes  
57 **(Supplementary Table 4)**. All samples were analyzed in duplicate. Each run included a serial  
58 dilution of a pooled cDNA mix from all cDNA samples and 2 no template controls to estimate  
59 the quantitative polymerase chain reaction efficiency. For reverse transcription quantitative  
60 real-time polymerase chain reaction (RT-qPCR) analysis, a reaction mix was prepared  
61 containing TaqMan® Fast Advanced Master Mix (Applied Biosystems, USA), Assay-on-  
62 Demand™ Gene Expression Assay Mix (Applied Biosystems, USA) and cDNA diluted in  
63 nuclease-free water. The qPCR conditions, using a StepOnePlus™ real-time PCR system  
64 (Life Technologies, USA), included incubation for 20 s at 95°C followed by 40 cycles of  
65 denaturation for 1 s at 95°C and annealing for 20 s at 60°C. Efficiency was estimated by  
66 StepOne Plus™ system's software and only data with PCR efficiency between 90% and  
67 110% were used. Stable candidate reference genes for normalization purposes were identified  
68 out of a pool of 6 genes as determined by geNorm using the qbase<sup>+</sup> software (Biogazelle,  
69 Belgium). The resulting ΔCq values of the test samples were normalized to those of the  
70 calibrator samples, yielding ΔΔCq values. Relative alterations (fold change) in RNA levels  
71 were calculated according to the Livak  $2^{-\Delta\Delta Cq}$  formula <sup>26</sup>.

72

73

74

75 **Supplementary Method 2. Cytotoxicity assay.** Cell viability after 24 h and 48 h of treatment  
76 with 0, 50, 100, 250 and 500  $\mu$ M TAT-Gap24 or TAT-Gap19 was assayed through a 3-(4,5-  
77 dimethylthiazol-2-yl)-2,5-diphenyltetrazolium bromide (MTT) test. Specifically, medium was  
78 removed from culture plates, followed by incubation for 1.5 h with MTT (Sigma Aldrich,  
79 USA), solubilized in hepatocyte culture medium. Subsequently, MTT solution was removed  
80 and replaced by an isopropanol (Thermo Scientific, USA)/1 M HCl 20:1 solution. Culture  
81 plates were shaken for 10 min and absorbance was measured at 570 nm using a  
82 spectrophotometer (Victor<sup>®</sup>, Perkin Elmer Precisely, USA). Results were normalized to  
83 100%, which corresponds with values at 0  $\mu$ M.

84

85

86

87

88

89

90

91

92

93

94

95

96 **Supplementary Table 1. Differentially expressed genes in liver tissue of CHFD-fed mice.**

97 RNA was extracted from liver tissue of CHFD-fed mice and ND-fed mice, and whole  
 98 transcriptome microarray analysis was performed using Affymetrix Clariom™ D mouse  
 99 arrays. Background correction, summarization and normalization of all data were done with  
 100 Expression Console and Affymetrix Transcriptome Analysis Console Software. Fold change  
 101 threshold was set at <-1.5 and >1.5, and results were statistically processed by 1-way analysis  
 102 of variance.

| Gene symbol                        | Fold change | p-value  | Description                                                                                                                     |
|------------------------------------|-------------|----------|---------------------------------------------------------------------------------------------------------------------------------|
| <i>Cyp4a14</i>                     | 11,30       | 0,000099 | cytochrome P450, family 4, subfamily a, polypeptide 14                                                                          |
| <i>Snora62</i>                     | 6,36        | 0,000000 | small nucleolar RNA, H/ACA box 62                                                                                               |
| <i>Mir505</i>                      | 4,35        | 0,000000 | microRNA 505                                                                                                                    |
| <i>Neat1</i>                       | 3,44        | 0,000000 | nuclear paraspeckle assembly transcript 1 (non-protein coding)                                                                  |
| <i>Snora75</i>                     | 3,42        | 0,000274 | small nucleolar RNA, H/ACA box 75                                                                                               |
| <i>Scarna17</i>                    | 3,38        | 0,000000 | small Cajal body-specific RNA 17                                                                                                |
| <i>Gtpbp4-ps1</i>                  | 3,06        | 0,000677 | GTP binding protein 4, pseudogene 1 [Source:MGI Symbol;Acc:MGI:5521100]                                                         |
| <i>Mir5125</i>                     | 3,02        | 0,000000 | microRNA 5125                                                                                                                   |
| <i>Mir122</i>                      | 2,92        | 0,000361 | microRNA 122                                                                                                                    |
| <i>Egln3</i>                       | 2,82        | 0,000147 | EGL nine homolog 3 ( <i>C. elegans</i> ), mRNA (cDNA clone MGC:36685 IMAGE:5371854), complete cds.                              |
| <i>Mir5124a;</i><br><i>Mir5124</i> | 2,69        | 0,000013 | microRNA 5124a [Source:MGI Symbol;Acc:MGI:4950449]; microRNA 5124                                                               |
| <i>Serpina7</i>                    | 2,61        | 0,000823 | serine (or cysteine) peptidase inhibitor, clade A (alpha-1 antiproteinase, antitrypsin), member 7                               |
| <i>Snord55</i>                     | 2,40        | 0,000000 | small nucleolar RNA, C/D box 55                                                                                                 |
| <i>Snord35a</i>                    | 2,38        | 0,000000 | small nucleolar RNA, C/D box 35A                                                                                                |
| <i>Snord123</i>                    | 2,38        | 0,000000 | small nucleolar RNA, C/D box 123                                                                                                |
| <i>Malat1;</i><br><i>MALAT1</i>    | 2,37        | 0,000001 | metastasis associated lung adenocarcinoma transcript 1 (non-coding RNA); Metastasis associated lung adenocarcinoma transcript 1 |
| <i>Mir1948</i>                     | 2,34        | 0,000121 | microRNA 1948                                                                                                                   |
| <i>4632427E13Rik</i>               | 2,33        | 0,000000 | RIKEN cDNA 4632427E13 gene                                                                                                      |
| <i>LOC432823</i>                   | 2,33        | 0,000000 | similar to hypothetical protein MGC37588, mRNA (cDNA clone MGC:28125 IMAGE:3980327), complete cds.                              |
| <i>LOC432823</i>                   | 2,28        | 0,000007 | similar to hypothetical protein MGC37588, mRNA (cDNA clone MGC:28125 IMAGE:3980327), complete cds.                              |
| <i>Vnn1</i>                        | 2,23        | 0,000001 | vanin 1                                                                                                                         |
| <i>Snord14e</i>                    | 2,21        | 0,000000 | small nucleolar RNA, C/D box 14E                                                                                                |
| <i>Ifi2712b</i>                    | 2,20        | 0,000011 | interferon, alpha-inducible protein 27 like 2B                                                                                  |
| <i>Lcn2</i>                        | 2,17        | 0,008407 | lipocalin 2                                                                                                                     |
| <i>Apoa4</i>                       | 2,17        | 0,000348 | apolipoprotein A-IV                                                                                                             |
| <i>Snord104</i>                    | 2,17        | 0,000000 | small nucleolar RNA, C/D box 104                                                                                                |
| <i>Mir5123</i>                     | 2,15        | 0,001749 | microRNA 5123                                                                                                                   |
| <i>Mmp12</i>                       | 2,15        | 0,000000 | matrix metalloproteinase 12                                                                                                     |
| <i>Igfbp1</i>                      | 2,13        | 0,016793 | insulin-like growth factor binding protein 1                                                                                    |
| <i>Lyz2</i>                        | 2,11        | 0,000001 | lysozyme 2                                                                                                                      |
| <i>Igkv4-55</i>                    | 2,10        | 0,000024 | immunoglobulin kappa variable 4-55                                                                                              |
| <i>Snord11</i>                     | 2,09        | 0,000068 | small nucleolar RNA, C/D box 11                                                                                                 |

|                      |      |          |                                                                                                    |
|----------------------|------|----------|----------------------------------------------------------------------------------------------------|
| <i>Snord70</i>       | 2,09 | 0,000014 | small nucleolar RNA, C/D box 70                                                                    |
| <i>Mir5125</i>       | 2,08 | 0,000000 | microRNA 5125                                                                                      |
| <i>Snord82</i>       | 2,07 | 0,000001 | small nucleolar RNA, C/D box 82                                                                    |
| <i>C530030P08Rik</i> | 2,07 | 0,000005 | RIKEN cDNA C530030P08 gene                                                                         |
| <i>Drr1</i>          | 2,05 | 0,000000 | developmentally regulated repeat element-containing transcript 1                                   |
| <i>LOC432823</i>     | 2,00 | 0,000001 | similar to hypothetical protein MGC37588, mRNA (cDNA clone MGC:28125 IMAGE:3980327), complete cds. |
| <i>Slc25a25</i>      | 1,99 | 0,001893 | solute carrier family 25 (mitochondrial carrier, phosphate carrier), member 25                     |
| <i>Rn4.5s</i>        | 1,99 | 0,000041 | 4.5S RNA; 4.5S RNA (Rn4.5s), ribosomal RNA.                                                        |
| <i>Gpymb</i>         | 1,98 | 0,000000 | glycoprotein (transmembrane) nmb                                                                   |
| <i>Cd36</i>          | 1,97 | 0,000026 | CD36 antigen                                                                                       |
| <i>Lgals1</i>        | 1,95 | 0,000001 | lectin, galactose binding, soluble 1                                                               |
| <i>Lilrb4a</i>       | 1,94 | 0,000001 | leukocyte immunoglobulin-like receptor, subfamily B, member 4A                                     |
| <i>Snord42a</i>      | 1,94 | 0,000001 | small nucleolar RNA, C/D box 42A                                                                   |
| <i>Mir297-1</i>      | 1,93 | 0,000002 | microRNA 297-1                                                                                     |
| <i>Gtpbp4-ps4</i>    | 1,91 | 0,000699 | GTP binding protein 4, pseudogene 4 [Source:MGI Symbol;Acc:MGI:5521103]                            |
| <i>Lilrb4b</i>       | 1,91 | 0,000004 | leukocyte immunoglobulin-like receptor, subfamily B, member 4B                                     |
| <i>S100a8</i>        | 1,90 | 0,000786 | S100 calcium binding protein A8 (calgranulin A)                                                    |
| <i>S100a11</i>       | 1,88 | 0,000946 | S100 calcium binding protein A11; S100 calcium binding protein A11 (calgizzarin)                   |
| <i>LOC432823</i>     | 1,88 | 0,000001 | similar to hypothetical protein MGC37588, mRNA (cDNA clone MGC:28125 IMAGE:3980327), complete cds. |
| <i>Lyz1</i>          | 1,88 | 0,000003 | lysozyme 1                                                                                         |
| <i>Snord35b</i>      | 1,86 | 0,000000 | small nucleolar RNA, C/D box 35B                                                                   |
| <i>Hamp</i>          | 1,84 | 0,000574 | hepcidin antimicrobial peptide                                                                     |
| <i>Cd68</i>          | 1,83 | 0,000002 | CD68 antigen (Cd68), mRNA.; CD68 antigen                                                           |
| <i>Mirlet7d</i>      | 1,83 | 0,000000 | microRNA let7d                                                                                     |
| <i>Clec7a</i>        | 1,81 | 0,000339 | C-type lectin domain family 7, member a                                                            |
| <i>Marco</i>         | 1,81 | 0,001656 | macrophage receptor with collagenous structure                                                     |
| <i>Lncpint</i>       | 1,80 | 0,000001 | long non-protein coding RNA, Trp53 induced transcript                                              |
| <i>Adam4</i>         | 1,79 | 0,000006 | a disintegrin and metallopeptidase domain 4                                                        |
| <i>2010003K11Rik</i> | 1,79 | 0,001104 | RIKEN cDNA 2010003K11 gene                                                                         |
| <i>Mir297a-2</i>     | 1,78 | 0,000027 | microRNA 297a-2                                                                                    |
| <i>Zfp361l-ps</i>    | 1,78 | 0,000025 | zinc finger protein 36, C3H type-like 1, pseudogene                                                |
| <i>Mir466f-3</i>     | 1,78 | 0,000076 | microRNA 466f-3                                                                                    |
| <i>Zfp361l</i>       | 1,77 | 0,000000 | zinc finger protein 36, C3H type-like 1                                                            |
| <i>Mir6983</i>       | 1,77 | 0,000064 | microRNA 6983                                                                                      |
| <i>Snord110</i>      | 1,75 | 0,000346 | small nucleolar RNA, C/D box 110                                                                   |
| <i>Hamp2</i>         | 1,75 | 0,001496 | hepcidin antimicrobial peptide 2                                                                   |
| <i>G0s2</i>          | 1,74 | 0,002499 | G0/G1 switch gene 2                                                                                |
| <i>LOC102637418</i>  | 1,74 | 0,000012 | protein FAM205A-like                                                                               |
| <i>Rny1</i>          | 1,73 | 0,000001 | RNA, Y1 small cytoplasmic, Ro-associated                                                           |
| <i>Rnu11</i>         | 1,72 | 0,000008 | U11 small nuclear RNA                                                                              |
| <i>Mir7026</i>       | 1,71 | 0,000163 | microRNA 7026                                                                                      |
| <i>Snord49a</i>      | 1,71 | 0,000055 | small nucleolar RNA, C/D box 49A                                                                   |
| <i>Mir1933</i>       | 1,70 | 0,000240 | microRNA 1933                                                                                      |
| <i>Igkv4-62</i>      | 1,69 | 0,000032 | immunoglobulin kappa variable 4-62                                                                 |
| <i>Abcd2</i>         | 1,69 | 0,009070 | ATP-binding cassette, sub-family D (ALD), member 2                                                 |
| <i>4930405O22Rik</i> | 1,69 | 0,000004 | RIKEN cDNA 4930405O22 gene                                                                         |
| <i>Mir1191</i>       | 1,68 | 0,000006 | microRNA 1191                                                                                      |
| <i>Snord8</i>        | 1,67 | 0,000000 | small nucleolar RNA, C/D box 8                                                                     |
| <i>Snord83b</i>      | 1,67 | 0,000006 | small nucleolar RNA, C/D box 83B                                                                   |
| <i>Igkv4-80</i>      | 1,66 | 0,000176 | immunoglobulin kappa variable 4-80                                                                 |

|                       |      |          |                                                                                                                                                                                                                                                                 |
|-----------------------|------|----------|-----------------------------------------------------------------------------------------------------------------------------------------------------------------------------------------------------------------------------------------------------------------|
| <i>Igkv4-79</i>       | 1,66 | 0,000076 | immunoglobulin kappa variable 4-79                                                                                                                                                                                                                              |
| <i>Tubb2a</i>         | 1,66 | 0,001963 | tubulin, beta 2A class IIA                                                                                                                                                                                                                                      |
| <i>Mir467c</i>        | 1,65 | 0,010498 | microRNA 467c                                                                                                                                                                                                                                                   |
| <i>Fabp2</i>          | 1,65 | 0,000001 | fatty acid binding protein 2, intestinal                                                                                                                                                                                                                        |
| <i>Rny1</i>           | 1,65 | 0,000005 | RNA, Y1 small cytoplasmic, Ro-associated                                                                                                                                                                                                                        |
| <i>Igkv4-68</i>       | 1,65 | 0,000332 | immunoglobulin kappa variable 4-68                                                                                                                                                                                                                              |
| <i>Mir669h</i>        | 1,65 | 0,000018 | microRNA 669h                                                                                                                                                                                                                                                   |
| <i>Slc7a7</i>         | 1,65 | 0,000025 | solute carrier family 7 (cationic amino acid transporter, y+ system), member 7                                                                                                                                                                                  |
| <i>Ctss</i>           | 1,63 | 0,000000 | cathepsin S; cathepsin S (Ctss), transcript variant 1, mRNA.                                                                                                                                                                                                    |
| <i>Peg10</i>          | 1,63 | 0,000029 | paternally expressed 10; Synthetic construct Mus musculus clone IMAGE:100062263, MGC:190439 paternally expressed 10 (Peg10) mRNA, encodes complete protein.                                                                                                     |
| <i>Ighv1-64</i>       | 1,63 | 0,003653 | immunoglobulin heavy variable 1-64                                                                                                                                                                                                                              |
| <i>Mir6353</i>        | 1,62 | 0,000074 | microRNA 6353                                                                                                                                                                                                                                                   |
| <i>Chka</i>           | 1,62 | 0,001245 | choline kinase alpha; choline kinase alpha (Chka), transcript variant 2, mRNA.; choline kinase alpha (Chka), transcript variant 1, mRNA.                                                                                                                        |
| <i>Snord73a</i>       | 1,61 | 0,000083 | small nucleolar RNA, C/D box U73A                                                                                                                                                                                                                               |
| <i>Ighv1-55</i>       | 1,61 | 0,000298 | immunoglobulin heavy variable 1-55                                                                                                                                                                                                                              |
| <i>Mir1192</i>        | 1,61 | 0,000144 | microRNA 1192                                                                                                                                                                                                                                                   |
| <i>Pten</i>           | 1,61 | 0,000006 | phosphatase and tensin homolog                                                                                                                                                                                                                                  |
| <i>Acnat2</i>         | 1,60 | 0,001981 | acyl-coenzyme A amino acid N-acyltransferase 2                                                                                                                                                                                                                  |
| <i>Mir292b</i>        | 1,60 | 0,003407 | microRNA 292b                                                                                                                                                                                                                                                   |
| <i>Gtpbp4-ps3</i>     | 1,60 | 0,000090 | GTP binding protein 4, pseudogene 3 [Source:MGI Symbol;Acc:MGI:5521093]                                                                                                                                                                                         |
| <i>Snord71</i>        | 1,60 | 0,000017 | small nucleolar RNA, C/D box 71                                                                                                                                                                                                                                 |
| <i>Plin4</i>          | 1,60 | 0,000001 | perilipin 4                                                                                                                                                                                                                                                     |
| <i>G6pc</i>           | 1,59 | 0,035526 | glucose-6-phosphatase, catalytic                                                                                                                                                                                                                                |
| <i>4930423O20Rik</i>  | 1,59 | 0,000106 | RIKEN cDNA 4930423O20 gene                                                                                                                                                                                                                                      |
| <i>Spon2</i>          | 1,58 | 0,000113 | spondin 2, extracellular matrix protein; spondin 2, extracellular matrix protein (Spon2), mRNA.                                                                                                                                                                 |
| <i>Igkv4-59</i>       | 1,58 | 0,000049 | immunoglobulin kappa variable 4-59                                                                                                                                                                                                                              |
| <i>Igkv4-57</i>       | 1,58 | 0,000088 | immunoglobulin kappa variable 4-57                                                                                                                                                                                                                              |
| <i>Scarna9</i>        | 1,58 | 0,014807 | small Cajal body-specific RNA 9                                                                                                                                                                                                                                 |
| <i>Ogt</i>            | 1,58 | 0,000000 | O-linked N-acetylglucosamine (GlcNAc) transferase (UDP-N-acetylglucosamine:polypeptide-N-acetylglucosaminyl transferase); O-linked N-acetylglucosamine (GlcNAc) transferase (UDP-N-acetylglucosamine:polypeptide-N-acetylglucosaminyl transferase) (Ogt), mRNA. |
| <i>Mir680-3</i>       | 1,58 | 0,000001 | microRNA 680-3                                                                                                                                                                                                                                                  |
| <i>Cd74; Mir5107</i>  | 1,58 | 0,006169 | CD74 antigen (invariant polypeptide of major histocompatibility complex, class II antigen-associated); microRNA 5107                                                                                                                                            |
| <i>2210017G18Rik</i>  | 1,57 | 0,000253 | RIKEN cDNA 2210017G18 gene                                                                                                                                                                                                                                      |
| <i>Igkv4-54</i>       | 1,57 | 0,000024 | immunoglobulin kappa chain variable 4-54                                                                                                                                                                                                                        |
| <i>Erd1</i>           | 1,57 | 0,000033 | erythroid differentiation regulator 1                                                                                                                                                                                                                           |
| <i>Mir6920</i>        | 1,57 | 0,002315 | microRNA 6920                                                                                                                                                                                                                                                   |
| <i>Snord89</i>        | 1,56 | 0,000152 | small nucleolar RNA, C/D box 89                                                                                                                                                                                                                                 |
| <i>Fcer1g</i>         | 1,56 | 0,000144 | Fc receptor, IgE, high affinity I, gamma polypeptide                                                                                                                                                                                                            |
| <i>Rhoc</i>           | 1,56 | 0,000000 | ras homolog gene family, member C                                                                                                                                                                                                                               |
| <i>C3ar1</i>          | 1,56 | 0,000003 | complement component 3a receptor 1                                                                                                                                                                                                                              |
| <i>Ighv1-26</i>       | 1,56 | 0,000113 | immunoglobulin heavy variable 1-26                                                                                                                                                                                                                              |
| <i>Mir3471-1</i>      | 1,55 | 0,000380 | microRNA 3471-1                                                                                                                                                                                                                                                 |
| <i>Igkv4-72</i>       | 1,55 | 0,000049 | immunoglobulin kappa chain variable 4-72                                                                                                                                                                                                                        |
| <i>Ccnd1; Mir3962</i> | 1,55 | 0,000002 | cyclin D1; microRNA 3962                                                                                                                                                                                                                                        |
| <i>Snora47</i>        | 1,55 | 0,000002 | small nucleolar RNA, H/ACA box 47                                                                                                                                                                                                                               |
| <i>Lpl</i>            | 1,54 | 0,000001 | lipoprotein lipase; lipoprotein lipase (Lpl), mRNA.                                                                                                                                                                                                             |

|                                         |       |          |                                                                                                                                                                                                                                             |
|-----------------------------------------|-------|----------|---------------------------------------------------------------------------------------------------------------------------------------------------------------------------------------------------------------------------------------------|
| <i>Mir467h</i>                          | 1,54  | 0,000182 | microRNA 467h [Source:MGI Symbol;Acc:MGI:3783381]                                                                                                                                                                                           |
| <i>Dusp6</i>                            | 1,54  | 0,049192 | dual specificity phosphatase 6                                                                                                                                                                                                              |
| <i>Mir325</i>                           | 1,54  | 0,008092 | microRNA 325                                                                                                                                                                                                                                |
| <i>Mir7213</i>                          | 1,54  | 0,000010 | microRNA 7213                                                                                                                                                                                                                               |
| <i>Tbrg3</i>                            | 1,54  | 0,000004 | transforming growth factor beta regulated gene 3; transforming growth factor beta regulated gene 3 ( <i>Tbrg3</i> ), non-coding RNA.                                                                                                        |
| <i>Mir466f-4</i>                        | 1,53  | 0,000005 | microRNA 466f-4 [Source:MGI Symbol;Acc:MGI:3783374]                                                                                                                                                                                         |
| <i>Cd84</i>                             | 1,53  | 0,000000 | CD84 antigen                                                                                                                                                                                                                                |
| <i>Clk1</i>                             | 1,53  | 0,000000 | CDC-like kinase 1; Synthetic construct Mus musculus clone IMAGE:100064101, MGC:193472 CDC-like kinase 1 ( <i>Clk1</i> ) mRNA, encodes complete protein.; CDC-like kinase 1 ( <i>Clk1</i> ), transcript variant 2, non-coding RNA.           |
| <i>Gpr52</i>                            | 1,53  | 0,001311 | G protein-coupled receptor 52; G protein-coupled receptor 52 ( <i>Gpr52</i> ), mRNA.                                                                                                                                                        |
| <i>Cd5l</i>                             | 1,53  | 0,000814 | CD5 antigen-like                                                                                                                                                                                                                            |
| <i>Arntl</i>                            | 1,53  | 0,001270 | aryl hydrocarbon receptor nuclear translocator-like                                                                                                                                                                                         |
| <i>Mir540</i>                           | 1,53  | 0,000301 | microRNA 540                                                                                                                                                                                                                                |
| <i>Mir5623</i>                          | 1,53  | 0,000022 | microRNA 5623                                                                                                                                                                                                                               |
| <b>9030622O22Rik;<br/>RP23-207P16.1</b> | 1,52  | 0,000585 | RIKEN cDNA 9030622O22 gene [Source:MGI Symbol;Acc:MGI:1918820]; novel transcript                                                                                                                                                            |
| <i>C1qc</i>                             | 1,52  | 0,000047 | complement component 1, q subcomponent, C chain                                                                                                                                                                                             |
| <i>St5</i>                              | 1,52  | 0,001403 | suppression of tumorigenicity 5                                                                                                                                                                                                             |
| <i>Snord14a</i>                         | 1,52  | 0,000189 | small nucleolar RNA, C/D box 14A                                                                                                                                                                                                            |
| <i>Mir15a</i>                           | 1,51  | 0,000518 | microRNA 15a                                                                                                                                                                                                                                |
| <i>Snord87</i>                          | 1,51  | 0,000045 | small nucleolar RNA, C/D box 87                                                                                                                                                                                                             |
| <i>Ifi30</i>                            | 1,51  | 0,000001 | interferon gamma inducible protein 30                                                                                                                                                                                                       |
| <i>Elovl5</i>                           | 1,51  | 0,002764 | ELOVL family member 5, elongation of long chain fatty acids (yeast)                                                                                                                                                                         |
| <i>Paqr9</i>                            | 1,51  | 0,001179 | progesterone and adipoQ receptor family member IX                                                                                                                                                                                           |
| <i>Slc17a8</i>                          | 1,51  | 0,000283 | solute carrier family 17 (sodium-dependent inorganic phosphate cotransporter), member 8                                                                                                                                                     |
| <i>Mir5099</i>                          | 1,51  | 0,000017 | microRNA 5099                                                                                                                                                                                                                               |
| <i>Ighv1-53</i>                         | 1,51  | 0,001465 | immunoglobulin heavy variable 1-53                                                                                                                                                                                                          |
| <i>Snord66</i>                          | 1,51  | 0,010138 | small nucleolar RNA, C/D box 66                                                                                                                                                                                                             |
| <b>E030024N20Rik</b>                    | 1,51  | 0,000581 | peptidylprolyl isomerase A pseudogene 8                                                                                                                                                                                                     |
| <i>Pisd-ps3</i>                         | 1,51  | 0,000000 | phosphatidylserine decarboxylase, pseudogene 3                                                                                                                                                                                              |
| <i>Mir5099</i>                          | 1,51  | 0,000017 | microRNA 5099                                                                                                                                                                                                                               |
| <i>Snora73a</i>                         | 1,51  | 0,000655 | small nucleolar RNA, H/ACA box 73a                                                                                                                                                                                                          |
| <i>Lgr4</i>                             | -1,51 | 0,000012 | leucine-rich repeat-containing G protein-coupled receptor 4; Synthetic construct Mus musculus clone IMAGE:100064037, MGC:193408 leucine-rich repeat-containing G protein-coupled receptor 4 ( <i>Lgr4</i> ) mRNA, encodes complete protein. |
| <i>Gatc</i>                             | -1,51 | 0,000221 | glutamyl-tRNA(Gln) amidotransferase, subunit C; glutamyl-tRNA(Gln) amidotransferase, subunit C homolog (bacterial)                                                                                                                          |
| <i>Cyp2f2</i>                           | -1,51 | 0,000004 | cytochrome P450, family 2, subfamily f, polypeptide 2                                                                                                                                                                                       |
| <i>Oat-rs1</i>                          | -1,51 | 0,000022 | ornithine aminotransferase related sequence 1                                                                                                                                                                                               |
| <i>Nr1d2</i>                            | -1,51 | 0,000003 | nuclear receptor subfamily 1, group D, member 2                                                                                                                                                                                             |
| <i>Amacr</i>                            | -1,51 | 0,000001 | alpha-methylacyl-CoA racemase                                                                                                                                                                                                               |
| <i>Cmbl</i>                             | -1,51 | 0,000000 | carboxymethylenebutenolidase-like ( <i>Pseudomonas</i> )                                                                                                                                                                                    |
| <i>Cyp2c54</i>                          | -1,51 | 0,000822 | cytochrome P450, family 2, subfamily c, polypeptide 54; Synthetic construct Mus musculus clone IMAGE:100066250, MGC:195387 cytochrome P450, family 2, subfamily c, polypeptide 54 ( <i>Cyp2c54</i> ) mRNA, encodes complete protein.        |
| <i>Slc43a1</i>                          | -1,52 | 0,000000 | solute carrier family 43, member 1                                                                                                                                                                                                          |
| <i>Neb</i>                              | -1,52 | 0,000134 | nebulin                                                                                                                                                                                                                                     |
| <i>Dbt</i>                              | -1,52 | 0,000005 | dihydrolipoamide branched chain transacylase E2                                                                                                                                                                                             |
| <i>Il6ra</i>                            | -1,52 | 0,000062 | interleukin 6 receptor, alpha                                                                                                                                                                                                               |
| <i>Cyp4a12b</i>                         | -1,52 | 0,000882 | cytochrome P450, family 4, subfamily a, polypeptide 12B                                                                                                                                                                                     |



|                    |       |          |                                                                                                                                                                                                                                                      |
|--------------------|-------|----------|------------------------------------------------------------------------------------------------------------------------------------------------------------------------------------------------------------------------------------------------------|
| <i>Ugt2b38</i>     | -1,52 | 0,000000 | UDP glucuronosyltransferase 2 family, polypeptide B38                                                                                                                                                                                                |
| <i>Vps33b</i>      | -1,52 | 0,000214 | vacuolar protein sorting 33B (yeast)                                                                                                                                                                                                                 |
| <i>Slc27a5</i>     | -1,52 | 0,000001 | solute carrier family 27 (fatty acid transporter), member 5                                                                                                                                                                                          |
| <i>Scap</i>        | -1,52 | 0,000013 | SREBF chaperone; SREBF chaperone (Scap), transcript variant 2, mRNA.                                                                                                                                                                                 |
| <i>Snx12</i>       | -1,52 | 0,000038 | sorting nexin 12                                                                                                                                                                                                                                     |
| <i>Snord118</i>    | -1,52 | 0,019691 | small nucleolar RNA, C/D box 118                                                                                                                                                                                                                     |
| <i>Manea</i>       | -1,53 | 0,000019 | mannosidase, endo-alpha                                                                                                                                                                                                                              |
| <i>Sult1d1</i>     | -1,53 | 0,000006 | sulfotransferase family 1D, member 1                                                                                                                                                                                                                 |
| <i>Slc25a15</i>    | -1,53 | 0,000007 | solute carrier family 25 (mitochondrial carrier ornithine transporter), member 15                                                                                                                                                                    |
| <i>DLEU2_5</i>     | -1,53 | 0,000718 | Deleted in lymphocytic leukemia 2 conserved region 5                                                                                                                                                                                                 |
| <i>Prodh</i>       | -1,53 | 0,000003 | proline dehydrogenase                                                                                                                                                                                                                                |
| <i>Fabp5l2</i>     | -1,53 | 0,001881 | fatty acid binding protein 5-like 2 [Source:MGI Symbol;Acc:MGI:3644282]                                                                                                                                                                              |
| <i>Fabp5</i>       | -1,54 | 0,007974 | fatty acid binding protein 5, epidermal                                                                                                                                                                                                              |
| <i>mt-Tn</i>       | -1,54 | 0,006425 | mitochondrially encoded tRNA asparagine [Source:MGI Symbol;Acc:MGI:102479]                                                                                                                                                                           |
| <i>Atp6v0a1</i>    | -1,54 | 0,000000 | ATPase, H <sup>+</sup> transporting, lysosomal V0 subunit A1                                                                                                                                                                                         |
| <i>Ttc38</i>       | -1,54 | 0,000002 | tetratricopeptide repeat domain 38                                                                                                                                                                                                                   |
| <i>Myeov2</i>      | -1,55 | 0,000005 | myeloma overexpressed 2                                                                                                                                                                                                                              |
| <i>Mfsd1</i>       | -1,55 | 0,000007 | major facilitator superfamily domain containing 1                                                                                                                                                                                                    |
| <i>Ap1ar</i>       | -1,55 | 0,000054 | adaptor-related protein complex 1 associated regulatory protein                                                                                                                                                                                      |
| <i>Slc25a13</i>    | -1,55 | 0,000000 | solute carrier family 25 (mitochondrial carrier, adenine nucleotide translocator), member 13                                                                                                                                                         |
| <i>F7</i>          | -1,55 | 0,000004 | coagulation factor VII                                                                                                                                                                                                                               |
| <i>Gstt3</i>       | -1,55 | 0,000006 | glutathione S-transferase, theta 3                                                                                                                                                                                                                   |
| <i>Slc25a21</i>    | -1,55 | 0,000002 | solute carrier family 25 (mitochondrial oxodicarboxylate carrier), member 21                                                                                                                                                                         |
| <i>Cmah</i>        | -1,55 | 0,000023 | cytidine monophospho-N-acetylneuraminic acid hydroxylase; cytidine monophospho-N-acetylneuraminic acid hydroxylase (Cmah), transcript variant 2, mRNA.; cytidine monophospho-N-acetylneuraminic acid hydroxylase (Cmah), transcript variant 1, mRNA. |
| <i>Zfp960</i>      | -1,55 | 0,000003 | zinc finger protein 960                                                                                                                                                                                                                              |
| <i>Pank1</i>       | -1,55 | 0,000000 | pantothenate kinase 1                                                                                                                                                                                                                                |
| <i>Ly96</i>        | -1,56 | 0,000623 | lymphocyte antigen 96                                                                                                                                                                                                                                |
| <i>Cyp2u1</i>      | -1,56 | 0,000007 | cytochrome P450, family 2, subfamily u, polypeptide 1; Synthetic construct Mus musculus clone IMAGE:100016290, MGC:184492 cytochrome P450, family 2, subfamily u, polypeptide 1 (Cyp2u1) mRNA, encodes complete protein.                             |
| <i>Bhlhe41</i>     | -1,56 | 0,000114 | basic helix-loop-helix family, member e41; Synthetic construct Mus musculus clone IMAGE:100069535, MGC:199437 basic helix-loop-helix family, member e41 (Bhlhe41) mRNA, encodes complete protein.                                                    |
| <i>Prss8</i>       | -1,56 | 0,000003 | protease, serine 8 (prostasin); protease, serine, 8 (prostasin); protease, serine, 8 (prostasin) (Prss8), mRNA.                                                                                                                                      |
| <i>Ccl9</i>        | -1,56 | 0,000005 | chemokine (C-C motif) ligand 9                                                                                                                                                                                                                       |
| <i>Mia2</i>        | -1,56 | 0,000009 | melanoma inhibitory activity 2; Synthetic construct Mus musculus clone IMAGE:100014983, MGC:180329 melanoma inhibitory activity 2 (Mia2) mRNA, encodes complete protein.                                                                             |
| <i>Rps2-ps6</i>    | -1,56 | 0,000006 | ribosomal protein S2, pseudogene 6 [Source:MGI Symbol;Acc:MGI:3644876]                                                                                                                                                                               |
| <i>D15Ertd621e</i> | -1,56 | 0,000007 | DNA segment, Chr 15, ERATO Doi 621, expressed                                                                                                                                                                                                        |
| <i>March6</i>      | -1,56 | 0,000003 | membrane-associated ring finger (C3HC4) 6                                                                                                                                                                                                            |
| <i>Snx29</i>       | -1,56 | 0,000002 | sorting nexin 29                                                                                                                                                                                                                                     |
| <i>Sgms2</i>       | -1,57 | 0,000032 | sphingomyelin synthase 2                                                                                                                                                                                                                             |
| <i>Dhdh</i>        | -1,57 | 0,000013 | dihydrodiol dehydrogenase (dimeric)                                                                                                                                                                                                                  |
| <i>Wdr46</i>       | -1,57 | 0,000000 | WD repeat domain 46                                                                                                                                                                                                                                  |
| <i>C8b</i>         | -1,58 | 0,000008 | complement component 8, beta polypeptide                                                                                                                                                                                                             |

|                             |       |          |                                                                                                               |
|-----------------------------|-------|----------|---------------------------------------------------------------------------------------------------------------|
| <i>Mir135a-1</i>            | -1,58 | 0,000003 | microRNA 135a-1                                                                                               |
| <i>Acp1</i>                 | -1,58 | 0,000000 | acid phosphatase 1, soluble                                                                                   |
| <i>Ggact</i>                | -1,58 | 0,000000 | gamma-glutamylamine cyclotransferase                                                                          |
| <i>Abat</i>                 | -1,58 | 0,000002 | 4-aminobutyrate aminotransferase                                                                              |
| <i>Srd5a2</i>               | -1,58 | 0,000333 | steroid 5 alpha-reductase 2                                                                                   |
| <i>Snora34;<br/>Mir1291</i> | -1,59 | 0,003544 | small nucleolar RNA, H/ACA box 34; microRNA 1291                                                              |
| <i>Alg14</i>                | -1,59 | 0,000046 | asparagine-linked glycosylation 14                                                                            |
| <i>Sephs2</i>               | -1,59 | 0,000001 | selenophosphate synthetase 2                                                                                  |
| <i>Rpl15-ps2</i>            | -1,59 | 0,000034 | ribosomal protein L15, pseudogene 2                                                                           |
| <i>Comm4</i>                | -1,59 | 0,000001 | COMM domain containing 4                                                                                      |
| <i>0610007P14Rik</i>        | -1,59 | 0,000000 | RIKEN cDNA 0610007P14 gene                                                                                    |
| <i>Snai2</i>                | -1,59 | 0,000072 | snail family zinc finger 2; snail homolog 2 (Drosophila)                                                      |
| <i>Jmjd8</i>                | -1,59 | 0,000000 | jumonji domain containing 8                                                                                   |
| <i>Upp2</i>                 | -1,60 | 0,000256 | uridine phosphorylase 2                                                                                       |
| <i>Hsd3b5</i>               | -1,60 | 0,003665 | hydroxy-delta-5-steroid dehydrogenase, 3 beta- and steroid delta-isomerase 5                                  |
| <i>Dnase2b</i>              | -1,60 | 0,000003 | deoxyribonuclease II beta                                                                                     |
| <i>Agmat</i>                | -1,60 | 0,000001 | agmatine ureohydrolase (agmatinase)                                                                           |
| <i>Aldh1l1</i>              | -1,60 | 0,000002 | aldehyde dehydrogenase 1 family, member L1                                                                    |
| <i>Tspan12</i>              | -1,60 | 0,000015 | tetraspanin 12                                                                                                |
| <i>Cyp2a5; Cyp2a4</i>       | -1,60 | 0,003458 | cytochrome P450, family 2, subfamily a, polypeptide 5; cytochrome P450, family 2, subfamily a, polypeptide 4  |
| <i>Ehd3</i>                 | -1,60 | 0,000006 | EH-domain containing 3                                                                                        |
| <i>As3mt</i>                | -1,60 | 0,000135 | arsenic (+3 oxidation state) methyltransferase                                                                |
| <i>Cd59a</i>                | -1,61 | 0,000023 | CD59a antigen                                                                                                 |
| <i>Rarres1</i>              | -1,61 | 0,000377 | retinoic acid receptor responder (tazarotene induced) 1                                                       |
| <i>Dbp</i>                  | -1,61 | 0,000311 | D site albumin promoter binding protein                                                                       |
| <i>Slc16a10</i>             | -1,61 | 0,000000 | solute carrier family 16 (monocarboxylic acid transporters), member 10                                        |
| <i>Tmem97</i>               | -1,61 | 0,000000 | transmembrane protein 97                                                                                      |
| <i>Abca6</i>                | -1,61 | 0,000001 | ATP-binding cassette, sub-family A (ABC1), member 6                                                           |
| <i>Ugt3a1</i>               | -1,61 | 0,000003 | UDP glycosyltransferases 3 family, polypeptide A1                                                             |
| <i>Pla1a</i>                | -1,61 | 0,000000 | phospholipase A1 member A                                                                                     |
| <i>Wee1</i>                 | -1,62 | 0,000010 | WEE 1 homolog 1 (S. pombe)                                                                                    |
| <i>Ldlr</i>                 | -1,62 | 0,000000 | low density lipoprotein receptor                                                                              |
| <i>Xlr3d-ps</i>             | -1,62 | 0,016325 | X-linked lymphocyte-regulated 3D, pseudogene                                                                  |
| <i>Igfals</i>               | -1,62 | 0,000020 | insulin-like growth factor binding protein, acid labile subunit                                               |
| <i>Sfxn2</i>                | -1,62 | 0,000001 | sideroflexin 2                                                                                                |
| <i>Idh3b</i>                | -1,63 | 0,000002 | isocitrate dehydrogenase 3 (NAD+) beta                                                                        |
| <i>Cth</i>                  | -1,63 | 0,000000 | cystathionase (cystathionine gamma-lyase)                                                                     |
| <i>Vma21-ps</i>             | -1,63 | 0,000036 | VMA21 vacuolar H <sup>+</sup> -ATPase homolog (S. cerevisiae), pseudogene [Source:MGI Symbol;Acc:MGI:3643145] |
| <i>Saa4</i>                 | -1,63 | 0,000238 | serum amyloid A 4                                                                                             |
| <i>Camk1d</i>               | -1,64 | 0,000002 | calcium/calmodulin-dependent protein kinase ID                                                                |
| <i>Mmd2</i>                 | -1,64 | 0,000208 | monocyte to macrophage differentiation-associated 2                                                           |
| <i>Gys2</i>                 | -1,64 | 0,000001 | glycogen synthase 2                                                                                           |
| <i>Got1</i>                 | -1,64 | 0,000608 | glutamic-oxaloacetic transaminase 1, soluble; glutamate oxaloacetate transaminase 1, soluble                  |
| <i>Cml2</i>                 | -1,65 | 0,000001 | camello-like 2                                                                                                |
| <i>Ces3b</i>                | -1,65 | 0,000006 | carboxylesterase 3B                                                                                           |
| <i>Tmem184c</i>             | -1,65 | 0,000015 | transmembrane protein 184C                                                                                    |
| <i>Tmem126a</i>             | -1,66 | 0,000000 | transmembrane protein 126A                                                                                    |
| <i>Dclk3</i>                | -1,66 | 0,000008 | doublecortin-like kinase 3                                                                                    |
| <i>Ap3m1-ps</i>             | -1,66 | 0,000003 | adaptor-related protein complex 3, mu 1 subunit, pseudogene [Source:MGI Symbol;Acc:MGI:3645307]               |

|                  |       |          |                                                                                                                                                                                                                                       |
|------------------|-------|----------|---------------------------------------------------------------------------------------------------------------------------------------------------------------------------------------------------------------------------------------|
| <i>Acly</i>      | -1,66 | 0,000016 | ATP citrate lyase                                                                                                                                                                                                                     |
| <i>Npc1</i>      | -1,66 | 0,000008 | Niemann-Pick type C1; Niemann Pick type C1                                                                                                                                                                                            |
| <i>Fam102a</i>   | -1,67 | 0,000002 | family with sequence similarity 102, member A; family with sequence similarity 102, member A (Fam102a), mRNA.                                                                                                                         |
| <i>Ugt2a3</i>    | -1,67 | 0,000000 | UDP glucuronosyltransferase 2 family, polypeptide A3                                                                                                                                                                                  |
| <i>Ces2d-ps</i>  | -1,67 | 0,000022 | carboxylesterase 2D, pseudogene                                                                                                                                                                                                       |
| <i>Otc</i>       | -1,67 | 0,000000 | ornithine transcarbamylase                                                                                                                                                                                                            |
| <i>Narf</i>      | -1,67 | 0,000000 | nuclear prelamin A recognition factor                                                                                                                                                                                                 |
| <i>Mocs1</i>     | -1,67 | 0,000034 | molybdenum cofactor synthesis 1                                                                                                                                                                                                       |
| <i>Hhex</i>      | -1,67 | 0,003884 | hematopoietically expressed homeobox                                                                                                                                                                                                  |
| <i>Pm20d1</i>    | -1,68 | 0,000000 | peptidase M20 domain containing 1                                                                                                                                                                                                     |
| <i>Mmab</i>      | -1,68 | 0,000000 | methylmalonic aciduria (cobalamin deficiency) type B homolog (human)                                                                                                                                                                  |
| <i>Ces2c</i>     | -1,68 | 0,000047 | carboxylesterase 2C                                                                                                                                                                                                                   |
| <i>Acpp</i>      | -1,68 | 0,000009 | acid phosphatase, prostate                                                                                                                                                                                                            |
| <i>mt-Tr</i>     | -1,68 | 0,000053 | mitochondrially encoded tRNA arginine [Source:MGI Symbol;Acc:MGI:102476]                                                                                                                                                              |
| <i>Gpx6</i>      | -1,68 | 0,000000 | glutathione peroxidase 6                                                                                                                                                                                                              |
| <i>Cyp2c70</i>   | -1,68 | 0,000050 | cytochrome P450, family 2, subfamily c, polypeptide 70                                                                                                                                                                                |
| <i>Itih5</i>     | -1,69 | 0,000000 | inter-alpha (globulin) inhibitor H5                                                                                                                                                                                                   |
| <i>Tm2d3</i>     | -1,69 | 0,000001 | TM2 domain containing 3                                                                                                                                                                                                               |
| <i>Oat</i>       | -1,69 | 0,000121 | ornithine aminotransferase                                                                                                                                                                                                            |
| <i>Sult5a1</i>   | -1,69 | 0,000298 | sulfotransferase family 5A, member 1                                                                                                                                                                                                  |
| <i>Rpl3-ps1</i>  | -1,69 | 0,000003 | ribosomal protein L3, pseudogene 1                                                                                                                                                                                                    |
| <i>Slco1a4</i>   | -1,70 | 0,003942 | solute carrier organic anion transporter family, member 1a4; Synthetic construct Mus musculus clone IMAGE:100062527, MGC:190906 solute carrier organic anion transporter family, member 1a4 (Slco1a4) mRNA, encodes complete protein. |
| <i>Cyp2a4</i>    | -1,71 | 0,001476 | cytochrome P450, family 2, subfamily a, polypeptide 4                                                                                                                                                                                 |
| <i>Aldh8a1</i>   | -1,71 | 0,000002 | aldehyde dehydrogenase 8 family, member A1                                                                                                                                                                                            |
| <i>Fbxw5</i>     | -1,72 | 0,000098 | F-box and WD-40 domain protein 5                                                                                                                                                                                                      |
| <i>Mgam</i>      | -1,72 | 0,000000 | maltase-glucoamylase                                                                                                                                                                                                                  |
| <i>Gls2</i>      | -1,72 | 0,000004 | glutaminase 2 (liver, mitochondrial); glutaminase 2 (liver, mitochondrial) (Gls2), nuclear gene encoding mitochondrial protein, mRNA.                                                                                                 |
| <i>Mvd</i>       | -1,73 | 0,000000 | mevalonate (diphospho) decarboxylase                                                                                                                                                                                                  |
| <i>Elovl6</i>    | -1,74 | 0,000042 | ELOVL family member 6, elongation of long chain fatty acids (yeast)                                                                                                                                                                   |
| <i>Usp18</i>     | -1,75 | 0,000030 | ubiquitin specific peptidase 18                                                                                                                                                                                                       |
| <i>Lhpp</i>      | -1,75 | 0,000000 | phospholysine phosphohistidine inorganic pyrophosphate phosphatase                                                                                                                                                                    |
| <i>Rps13-ps2</i> | -1,76 | 0,000005 | ribosomal protein S13, pseudogene 2                                                                                                                                                                                                   |
| <i>Tbc1d30</i>   | -1,76 | 0,000008 | TBC1 domain family, member 30                                                                                                                                                                                                         |
| <i>Enpp2</i>     | -1,76 | 0,000014 | ectonucleotide pyrophosphatase/phosphodiesterase 2                                                                                                                                                                                    |
| <i>Antxr2</i>    | -1,77 | 0,000001 | anthrax toxin receptor 2                                                                                                                                                                                                              |
| <i>Car5a</i>     | -1,77 | 0,000000 | carbonic anhydrase 5a, mitochondrial                                                                                                                                                                                                  |
| <i>Rab9b-ps1</i> | -1,77 | 0,000087 | RAB9B, member RAS oncogene family, pseudogene 1                                                                                                                                                                                       |
| <i>Ndufb9</i>    | -1,77 | 0,000001 | NADH dehydrogenase (ubiquinone) 1 beta subcomplex, 9                                                                                                                                                                                  |
| <i>Fzd8</i>      | -1,80 | 0,000267 | frizzled homolog 8 (Drosophila)                                                                                                                                                                                                       |
| <i>Ugt2b1</i>    | -1,83 | 0,000000 | UDP glucuronosyltransferase 2 family, polypeptide B1                                                                                                                                                                                  |
| <i>Dmgdh</i>     | -1,83 | 0,000000 | dimethylglycine dehydrogenase precursor                                                                                                                                                                                               |
| <i>Lrtm1</i>     | -1,83 | 0,000001 | leucine-rich repeats and transmembrane domains 1                                                                                                                                                                                      |
| <i>Kcnk5</i>     | -1,84 | 0,000059 | potassium channel, subfamily K, member 5                                                                                                                                                                                              |
| <i>Etnppl</i>    | -1,85 | 0,000000 | ethanolamine phosphate phospholyase                                                                                                                                                                                                   |
| <i>Dhcr7</i>     | -1,86 | 0,000000 | 7-dehydrocholesterol reductase                                                                                                                                                                                                        |
| <i>Mr1</i>       | -1,87 | 0,000000 | major histocompatibility complex, class I-related                                                                                                                                                                                     |
| <i>Acss2</i>     | -1,87 | 0,000000 | acyl-CoA synthetase short-chain family member 2                                                                                                                                                                                       |
| <i>Snord13</i>   | -1,88 | 0,006153 | small nucleolar RNA, C/D box 13                                                                                                                                                                                                       |
| <i>mt-Tk</i>     | -1,89 | 0,006851 | mitochondrially encoded tRNA lysine [Source:MGI                                                                                                                                                                                       |

|                     |       |          | Symbol;Acc:MGI:102483]                                                                                                                                                                             |
|---------------------|-------|----------|----------------------------------------------------------------------------------------------------------------------------------------------------------------------------------------------------|
| <i>Pcsk9</i>        | -1,89 | 0,000000 | proprotein convertase subtilisin/kexin type 9                                                                                                                                                      |
| <i>Scpep1</i>       | -1,89 | 0,000000 | serine carboxypeptidase 1                                                                                                                                                                          |
| <i>Tstd1</i>        | -1,92 | 0,000000 | thiosulfate sulfurtransferase (rhodanese)-like domain containing 1                                                                                                                                 |
| <i>Cyp2r1</i>       | -1,94 | 0,000000 | cytochrome P450, family 2, subfamily r, polypeptide 1; cytochrome P450, family 2, subfamily r, polypeptide 1 (Cyp2r1), mRNA.                                                                       |
| <i>Aadat</i>        | -1,94 | 0,000015 | aminoadipate aminotransferase                                                                                                                                                                      |
| <i>Pdcd4</i>        | -1,94 | 0,000000 | programmed cell death 4                                                                                                                                                                            |
| <i>Cyp2c68</i>      | -1,94 | 0,000000 | cytochrome P450, family 2, subfamily c, polypeptide 68                                                                                                                                             |
| <i>Cyp2c40</i>      | -1,94 | 0,000000 | cytochrome P450, family 2, subfamily c, polypeptide 40                                                                                                                                             |
| <i>Insig1</i>       | -1,96 | 0,000001 | insulin induced gene 1                                                                                                                                                                             |
| <i>Slc17a5</i>      | -1,97 | 0,000002 | solute carrier family 17 (anion/sugar transporter), member 5                                                                                                                                       |
| <i>Cyp7b1</i>       | -1,98 | 0,000002 | cytochrome P450, family 7, subfamily b, polypeptide 1                                                                                                                                              |
| <i>Chic1</i>        | -1,98 | 0,000000 | cysteine-rich hydrophobic domain 1                                                                                                                                                                 |
| <i>Aldoc</i>        | -1,98 | 0,000000 | aldolase C, fructose-bisphosphate                                                                                                                                                                  |
| <i>Usp2</i>         | -2,00 | 0,000000 | ubiquitin specific peptidase 2                                                                                                                                                                     |
| <i>Bhmt</i>         | -2,00 | 0,000021 | betaine-homocysteine methyltransferase                                                                                                                                                             |
| <i>Cyp2c67</i>      | -2,00 | 0,000001 | cytochrome P450, family 2, subfamily c, polypeptide 67                                                                                                                                             |
| <i>Pmvk</i>         | -2,01 | 0,000000 | phosphomevalonate kinase                                                                                                                                                                           |
| <i>Nudt7</i>        | -2,01 | 0,003371 | nudix (nucleoside diphosphate linked moiety X)-type motif 7                                                                                                                                        |
| <i>Tlcd2</i>        | -2,03 | 0,000011 | TLC domain containing 2                                                                                                                                                                            |
| <i>Stard4</i>       | -2,04 | 0,000000 | StAR-related lipid transfer (START) domain containing 4                                                                                                                                            |
| <i>Cyp2c69</i>      | -2,04 | 0,000000 | cytochrome P450, family 2, subfamily c, polypeptide 69                                                                                                                                             |
| <i>Coq5</i>         | -2,07 | 0,000008 | coenzyme Q5 homolog, methyltransferase (yeast)                                                                                                                                                     |
| <i>Pstpip2</i>      | -2,07 | 0,000000 | proline-serine-threonine phosphatase-interacting protein 2                                                                                                                                         |
| <i>Foxq1</i>        | -2,08 | 0,010672 | forkhead box Q1                                                                                                                                                                                    |
| <i>Fam213a</i>      | -2,08 | 0,000000 | family with sequence similarity 213, member A                                                                                                                                                      |
| <i>Lifr</i>         | -2,09 | 0,000034 | leukemia inhibitory factor receptor                                                                                                                                                                |
| <i>Selenbp1</i>     | -2,10 | 0,000015 | selenium binding protein 1                                                                                                                                                                         |
| <i>Mvk</i>          | -2,10 | 0,000000 | mevalonate kinase                                                                                                                                                                                  |
| <i>Myc</i>          | -2,11 | 0,024083 | myelocytomatosis oncogene                                                                                                                                                                          |
| <i>Mpv17l</i>       | -2,11 | 0,000000 | Mpv17 transgene, kidney disease mutant-like; Mpv17 transgene, kidney disease mutant-like (Mpv17l), nuclear gene encoding mitochondrial protein, mRNA.                                              |
| <i>Sult1b1</i>      | -2,14 | 0,000000 | sulfotransferase family 1B, member 1                                                                                                                                                               |
| <i>Car1</i>         | -2,18 | 0,000000 | carbonic anhydrase 1                                                                                                                                                                               |
| <i>Slc23a1</i>      | -2,19 | 0,000001 | solute carrier family 23 (nucleobase transporters), member 1                                                                                                                                       |
| <i>Lpin1</i>        | -2,20 | 0,000049 | lipin 1                                                                                                                                                                                            |
| <i>Snord13</i>      | -2,21 | 0,003047 | small nucleolar RNA, C/D box 13                                                                                                                                                                    |
| <i>Susd4</i>        | -2,22 | 0,000001 | sushi domain containing 4                                                                                                                                                                          |
| <i>mt-Tf</i>        | -2,24 | 0,010174 | mitochondrially encoded tRNA phenylalanine [Source:MGI Symbol;Acc:MGI:102487]                                                                                                                      |
| <i>F11</i>          | -2,26 | 0,000000 | coagulation factor XI                                                                                                                                                                              |
| <i>LOC102631757</i> | -2,26 | 0,000010 | uncharacterized LOC102631757                                                                                                                                                                       |
| <i>Urad</i>         | -2,27 | 0,000001 | ureidoimidazole (2-oxo-4-hydroxy-4-carboxy-5) decarboxylase                                                                                                                                        |
| <i>Gpcpd1</i>       | -2,32 | 0,000336 | glycerophosphocholine phosphodiesterase GDE1 homolog ( <i>S. cerevisiae</i> ) (Gpcpd1), transcript variant 3, mRNA.; glycerophosphocholine phosphodiesterase GDE1 homolog ( <i>S. cerevisiae</i> ) |
| <i>Hmgcr</i>        | -2,35 | 0,000000 | 3-hydroxy-3-methylglutaryl-Coenzyme A reductase                                                                                                                                                    |
| <i>Selenbp2</i>     | -2,36 | 0,000022 | selenium binding protein 2                                                                                                                                                                         |
| <i>Fdft1</i>        | -2,45 | 0,000000 | farnesyl diphosphate farnesyl transferase 1                                                                                                                                                        |
| <i>Acmsd</i>        | -2,55 | 0,000000 | amino carboxymuconate semialdehyde decarboxylase                                                                                                                                                   |
| <i>Lss</i>          | -2,65 | 0,000000 | lanosterol synthase                                                                                                                                                                                |
| <i>Slc46a3</i>      | -2,68 | 0,000000 | solute carrier family 46, member 3                                                                                                                                                                 |
| <i>mt-Ta</i>        | -2,75 | 0,003469 | mitochondrially encoded tRNA alanine [Source:MGI                                                                                                                                                   |

| Symbol;Acc:MGI:102491] |        |          |                                                                                                                                                     |
|------------------------|--------|----------|-----------------------------------------------------------------------------------------------------------------------------------------------------|
| <i>Cyp17a1</i>         | -2,88  | 0,000001 | cytochrome P450, family 17, subfamily a, polypeptide 1                                                                                              |
| <i>Thrsp</i>           | -2,89  | 0,000002 | thyroid hormone responsive                                                                                                                          |
| <i>Rdh11</i>           | -2,89  | 0,000000 | retinol dehydrogenase 11                                                                                                                            |
| <i>Bhmt-ps1</i>        | -2,92  | 0,000001 | betaine-homocysteine methyltransferase, pseudogene 1                                                                                                |
| <i>Papss2</i>          | -3,09  | 0,000000 | 3-phosphoadenosine 5-phosphosulfate synthase 2; 3'-phosphoadenosine 5'-phosphosulfate synthase 2                                                    |
| <i>Snora69</i>         | -3,14  | 0,000001 | small nucleolar RNA, H/ACA box 69                                                                                                                   |
| <i>Hsd17b7</i>         | -3,16  | 0,000000 | hydroxysteroid (17-beta) dehydrogenase 7                                                                                                            |
| <i>mt-Ts2; mt-Tl2</i>  | -3,41  | 0,034437 | mitochondrially encoded tRNA serine 2 [Source:MGI Symbol;Acc:MGI:102474]; mitochondrially encoded tRNA leucine 2 [Source:MGI Symbol;Acc:MGI:102481] |
| <i>Hmgcs1</i>          | -3,74  | 0,000000 | 3-hydroxy-3-methylglutaryl-Coenzyme A synthase 1                                                                                                    |
| <i>Cyp51</i>           | -4,00  | 0,000000 | cytochrome P450, family 51                                                                                                                          |
| <i>Nsdhl</i>           | -4,47  | 0,000000 | NAD(P) dependent steroid dehydrogenase-like                                                                                                         |
| <i>Fdps</i>            | -4,50  | 0,000000 | farnesyl diphosphate synthetase                                                                                                                     |
| <i>Clec2h</i>          | -4,61  | 0,000002 | C-type lectin domain family 2, member h                                                                                                             |
| <i>Msmo1</i>           | -4,69  | 0,000000 | methylsterol monooxygenase 1                                                                                                                        |
| <i>Adgrf1</i>          | -6,39  | 0,000000 | adhesion G protein-coupled receptor F1                                                                                                              |
| <i>Idi1</i>            | -7,28  | 0,000000 | isopentenyl-diphosphate delta isomerase                                                                                                             |
| <i>Moxd1</i>           | -10,08 | 0,000338 | monooxygenase, DBH-like 1                                                                                                                           |
| <i>Sqle</i>            | -10,26 | 0,000000 | squalene epoxidase                                                                                                                                  |

103

104

105

106

107

108

109

110

111

112

113

114 **Supplementary Table 2. Differentially expressed genes in liver tissue of TAT-Gap19-**  
115 **treated mice.** RNA was extracted from liver tissue of TAT-Gap19-treated and saline-treated  
116 mice, and whole transcriptome microarray analysis was performed using Affymetrix  
117 Clariom™ D mouse arrays. Background correction, summarization and normalization of all  
118 data were done with Expression Console and Affymetrix Transcriptome Analysis Console  
119 Software. Fold change threshold was set at <-1.5 and >1.5, and results were statistically  
120 processed by 1-way analysis of variance.

| Gene symbol                       | Fold change | p-value  | Description                                                                  |
|-----------------------------------|-------------|----------|------------------------------------------------------------------------------|
| <i>Snora41</i>                    | 2,27        | 0,000016 | small nucleolar RNA, H/ACA box 41                                            |
| <i>Snora36b;</i><br><i>Mir664</i> | 2,03        | 0,015950 | small nucleolar RNA, H/ACA box 36B; microRNA 664                             |
| <i>Tff3</i>                       | 2,01        | 0,001641 | trefoil factor 3, intestinal                                                 |
| <i>Mir669b</i>                    | 1,99        | 0,028966 | microRNA 669b                                                                |
| <i>Scarna6</i>                    | 1,99        | 0,001413 | small Cajal body-specific RNA 6                                              |
| <i>Rnu2-10</i>                    | 1,74        | 0,003643 | U2 small nuclear RNA 10                                                      |
| <i>Thrsp</i>                      | 1,74        | 0,011785 | thyroid hormone responsive                                                   |
| <i>Rnu2-10</i>                    | 1,73        | 0,004916 | U2 small nuclear RNA 10                                                      |
| <i>Rnu12</i>                      | 1,72        | 0,045477 | RNA U12, small nuclear                                                       |
| <i>Mir505</i>                     | 1,69        | 0,000064 | microRNA 505                                                                 |
| <i>Snord71</i>                    | 1,67        | 0,000033 | small nucleolar RNA, C/D box 71                                              |
| <i>Snora7a</i>                    | 1,65        | 0,001927 | small nucleolar RNA, H/ACA box 7A                                            |
| <i>Selenbp2</i>                   | 1,63        | 0,013367 | selenium binding protein 2                                                   |
| <i>Snord49a</i>                   | 1,60        | 0,000157 | small nucleolar RNA, C/D box 49A                                             |
| <i>Snord14e</i>                   | 1,57        | 0,004053 | small nucleolar RNA, C/D box 14E                                             |
| <i>Cyp7b1</i>                     | 1,57        | 0,009359 | cytochrome P450, family 7, subfamily b, polypeptide 1                        |
| <i>Obox4-ps3</i>                  | 1,54        | 0,021734 | oocyte specific homeobox 4, pseudogene 3 [Source:MGI Symbol;Acc:MGI:5521023] |
| <i>Rb1</i>                        | 1,54        | 0,017943 | retinoblastoma 1                                                             |
| <i>Mir15a</i>                     | 1,53        | 0,002577 | microRNA 15a                                                                 |
| <i>Ctsc</i>                       | -1,53       | 0,008574 | cathepsin C                                                                  |
| <i>Cd53</i>                       | -1,53       | 0,000183 | CD53 antigen                                                                 |
| <i>Folr2</i>                      | -1,53       | 0,006662 | folate receptor 2 (fetal)                                                    |
| <i>Hmox1</i>                      | -1,53       | 0,000056 | heme oxygenase 1; heme oxygenase (decycling) 1                               |
| <i>Acot3</i>                      | -1,54       | 0,009736 | acyl-CoA thioesterase 3                                                      |
| <i>Cybb</i>                       | -1,56       | 0,000188 | cytochrome b-245, beta polypeptide                                           |
| <i>Adgre1</i>                     | -1,57       | 0,001940 | adhesion G protein-coupled receptor E1                                       |
| <i>Gsta2</i>                      | -1,58       | 0,003164 | glutathione S-transferase, alpha 2 (Yc2)                                     |
| <i>Ifi2712b</i>                   | -1,60       | 0,015937 | interferon, alpha-inducible protein 27 like 2B                               |
| <i>GpnmB</i>                      | -1,61       | 0,000055 | glycoprotein (transmembrane) nmb                                             |

|                   |       |          |                                                                                                   |
|-------------------|-------|----------|---------------------------------------------------------------------------------------------------|
| <i>Gtpbp4-ps4</i> | -1,62 | 0,003893 | GTP binding protein 4, pseudogene 4 [Source:MGI Symbol;Acc:MGI:5521103]                           |
| <i>Lilr4b</i>     | -1,62 | 0,000120 | leukocyte immunoglobulin-like receptor, subfamily B, member 4B                                    |
| <i>Ly86</i>       | -1,62 | 0,000075 | lymphocyte antigen 86                                                                             |
| <i>Vsig4</i>      | -1,64 | 0,023868 | V-set and immunoglobulin domain containing 4                                                      |
| <i>Lyz1</i>       | -1,66 | 0,000126 | lysozyme 1                                                                                        |
| <i>Cd68</i>       | -1,67 | 0,000017 | CD68 antigen (Cd68), mRNA.; CD68 antigen                                                          |
| <i>Cd51</i>       | -1,69 | 0,006313 | CD5 antigen-like                                                                                  |
| <i>Ctss</i>       | -1,69 | 0,000229 | cathepsin S; cathepsin S (Ctss), transcript variant 1, mRNA.                                      |
| <i>Fcgr1g</i>     | -1,75 | 0,000045 | Fc receptor, IgE, high affinity I, gamma polypeptide                                              |
| <i>Lilrb4a</i>    | -1,76 | 0,000019 | leukocyte immunoglobulin-like receptor, subfamily B, member 4A                                    |
| <i>Wfdc17</i>     | -1,80 | 0,000416 | WAP four-disulfide core domain 17                                                                 |
| <i>Mmp12</i>      | -1,82 | 0,000009 | matrix metallopeptidase 12                                                                        |
| <i>C1qb</i>       | -1,87 | 0,000174 | complement component 1, q subcomponent, beta polypeptide                                          |
| <i>Serpina7</i>   | -1,91 | 0,022512 | serine (or cysteine) peptidase inhibitor, clade A (alpha-1 antiproteinase, antitrypsin), member 7 |
| <i>Cd36</i>       | -1,92 | 0,006360 | CD36 antigen                                                                                      |
| <i>Igfbp1</i>     | -1,94 | 0,046974 | insulin-like growth factor binding protein 1                                                      |
| <i>Clec7a</i>     | -2,06 | 0,000050 | C-type lectin domain family 7, member a                                                           |
| <i>Lyz2</i>       | -2,17 | 0,000044 | lysozyme 2                                                                                        |
| <i>Mfsd2a</i>     | -2,26 | 0,004871 | major facilitator superfamily domain containing 2A                                                |
| <i>Gtpbp4-ps1</i> | -2,29 | 0,001300 | GTP binding protein 4, pseudogene 1 [Source:MGI Symbol;Acc:MGI:5521100]                           |

121

122

123

124

125

126

127

128

129

130

131

132

133 **Supplementary Table 3. Differentially expressed genes in liver tissue of TAT-Gap24-**  
134 **treated mice.** RNA was extracted from liver tissue of TAT-Gap24- and saline-treated mice  
135 and whole transcriptome microarray analysis was performed using Affymetrix Clariom™ D  
136 mouse arrays. Background correction, summarization and normalization of all data were done  
137 with Expression Console and Affymetrix Transcriptome Analysis Console Software. Fold  
138 change threshold was set at <-1.5 and >1.5, and results were statistically processed by 1-way  
139 analysis of variance.

| Gene symbol                       | Fold change | p-value  | Description                                                                                                                                                            |
|-----------------------------------|-------------|----------|------------------------------------------------------------------------------------------------------------------------------------------------------------------------|
| <i>Snora62</i>                    | 1,83        | 0,016622 | small nucleolar RNA, H/ACA box 62                                                                                                                                      |
| <i>Mir5125</i>                    | 1,76        | 0,011733 | microRNA 5125                                                                                                                                                          |
| <i>mt-Tk</i>                      | 1,76        | 0,049245 | mitochondrially encoded tRNA lysine [Source:MGI Symbol;Acc:MGI:102483]                                                                                                 |
| <i>Rnu12</i>                      | 1,72        | 0,026838 | RNA U12, small nuclear                                                                                                                                                 |
| <i>Egl3</i>                       | 1,70        | 0,023996 | EGL nine homolog 3 (C. elegans), mRNA (cDNA clone MGC:36685 IMAGE:5371854), complete cds.                                                                              |
| <i>Scarna6</i>                    | 1,59        | 0,012201 | small Cajal body-specific RNA 6                                                                                                                                        |
| <i>Mir466f-4</i>                  | 1,57        | 0,003358 | microRNA 466f-4 [Source:MGI Symbol;Acc:MGI:3783374]                                                                                                                    |
| <i>Rb1</i>                        | 1,53        | 0,002388 | retinoblastoma 1                                                                                                                                                       |
| <i>Mir15a</i>                     | 1,53        | 0,009847 | microRNA 15a                                                                                                                                                           |
| <i>Mlxipl</i>                     | 1,53        | 0,012992 | MLX interacting protein-like; Synthetic construct Mus musculus clone IMAGE:100068140, MGC:195757 MLX interacting protein-like (Mlxipl) mRNA, encodes complete protein. |
| <i>Mir5125</i>                    | 1,51        | 0,015165 | microRNA 5125                                                                                                                                                          |
| <i>Snord4a</i>                    | -1,51       | 0,000624 | small nucleolar RNA, C/D box 4A                                                                                                                                        |
| <i>Lyz2</i>                       | -1,59       | 0,000379 | lysozyme 2                                                                                                                                                             |
| <i>Snord11</i>                    | -1,63       | 0,000496 | small nucleolar RNA, C/D box 11                                                                                                                                        |
| <i>Clec7a</i>                     | -1,66       | 0,017295 | C-type lectin domain family 7, member a                                                                                                                                |
| <i>Snora34;</i><br><i>Mir1291</i> | -1,72       | 0,001410 | small nucleolar RNA, H/ACA box 34; microRNA 1291                                                                                                                       |
| <i>Wfdc17</i>                     | -1,84       | 0,000221 | WAP four-disulfide core domain 17                                                                                                                                      |

140  
141  
142  
143  
144  
145  
146  
147  
148



149 **Supplementary Table 4. Primers used for qRT-PCR analysis.**

| Gene         | Assay ID      | Accession number | Assay location | Amplicon size (base pairs) | Exon boundary |
|--------------|---------------|------------------|----------------|----------------------------|---------------|
| <i>Gja1</i>  | Mm01179639_s1 | NM_010288.3      | 2937           | 168                        | 2-2           |
| <i>Gjb2</i>  | Mm00433643_s1 | NM_008125.3      | 603            | 72                         | 2-2           |
| <i>Gjb1</i>  | Mm01950058_s1 | NM_008124.2      | 466            | 65                         | 1-1           |
| <i>18S</i>   | Hs99999901_s1 | X03205.1         | 604            | 187                        | 1-1           |
| <i>Actb</i>  | Mm00607939_s1 | NM_007393.3      | 1233           | 115                        | 6-6           |
| <i>B2m</i>   | Mm00437762_m1 | NM_009735.3      | 111            | 77                         | 1-2           |
| <i>Gapdh</i> | Mm99999915_g1 | NM_008084.2      | 265            | 107                        | 2-3           |
| <i>Hmbs</i>  | Mm01143545_m1 | NM_013551.2      | 473            | 81                         | 6-7           |
| <i>Ubc</i>   | Mm02525934_g1 | NM_019639.4      | 370            | 176                        | 2-2           |

150

151

152

153

154

155

156

157

158

159

160

161

162

163

164 **Supplementary Figure 1. Effects of TAT-Gap24 and TAT-Gap19 on hepatocyte**  
165 **viability.** MTT test after exposure of TAT-Gap24 and TAT-Gap19 for 24 h and 48 h. Results  
166 were normalized to 100%, which corresponds with values at 0  $\mu\text{M}$ , and data are expressed as  
167 means  $\pm$  SEM.

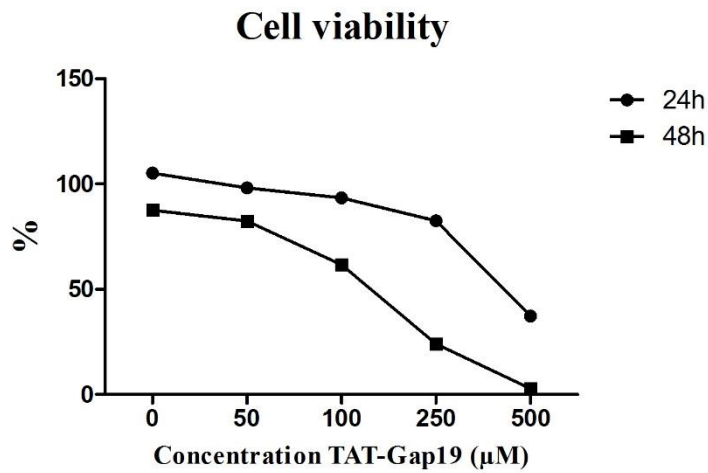

168

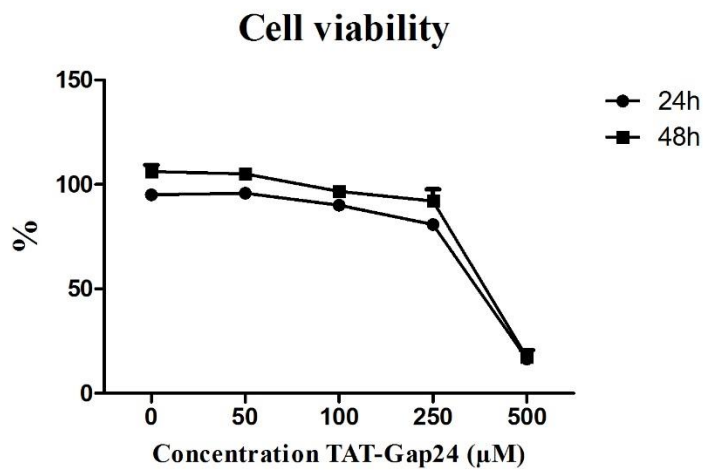

169

170

171

172

173

174 **Supplementary Figure 2. Effects of CHFD on connexin mRNA and protein expression in**  
175 **liver.** Immunoblot analysis of Cx26 (21 kDa), Cx32 (27 kDa) and Cx43 (43 kDa) after  
176 separation and blotting after which results were normalized to total protein. Blot images are  
177 cropped. Full-length blots are presented in Supplementary Figure 4. Data are expressed as  
178 means  $\pm$  SEM with \* $p$ <0.5 and \*\* $p$ <0.01.

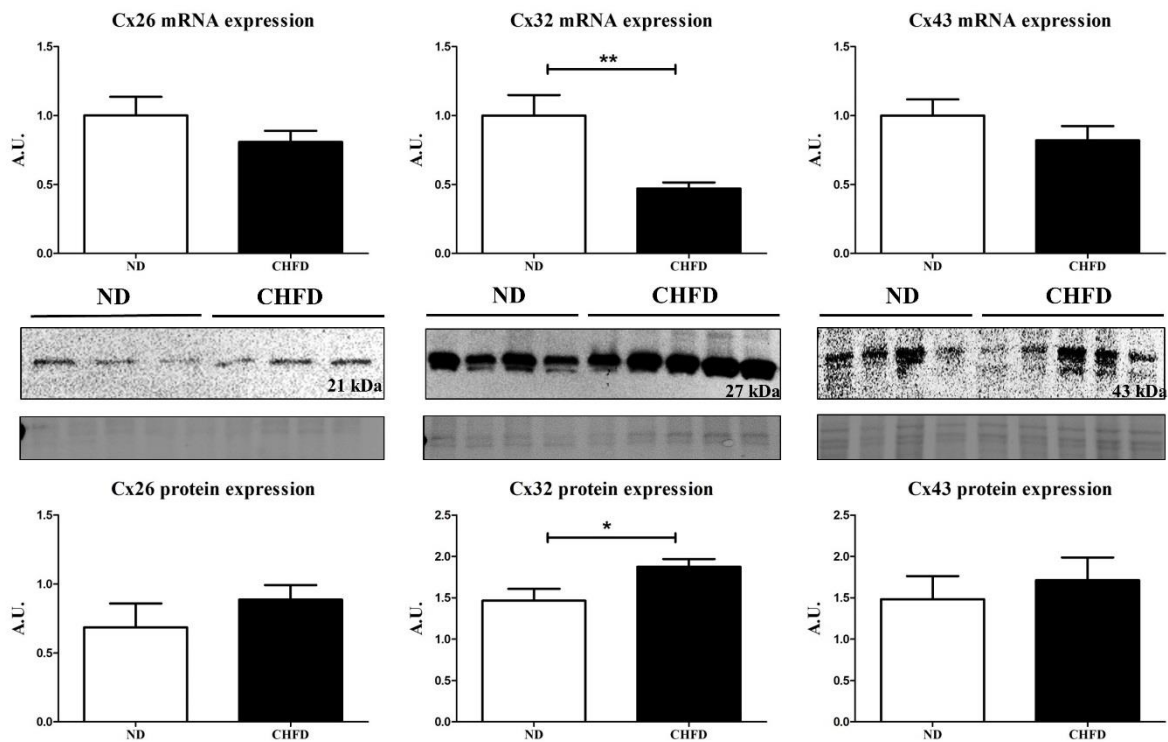

179

180

181

182

183

184

185

186 **Supplementary Figure 3. Full-length blots of Supplementary Figure 2. Effects of CHFD**  
187 **on connexin mRNA and protein expression in liver.** Immunoblot analysis of Cx26 (21  
188 kDa), Cx32 (27 kDa) and Cx43 (43 kDa) after separation and blotting, after which results  
189 were normalized to total protein.

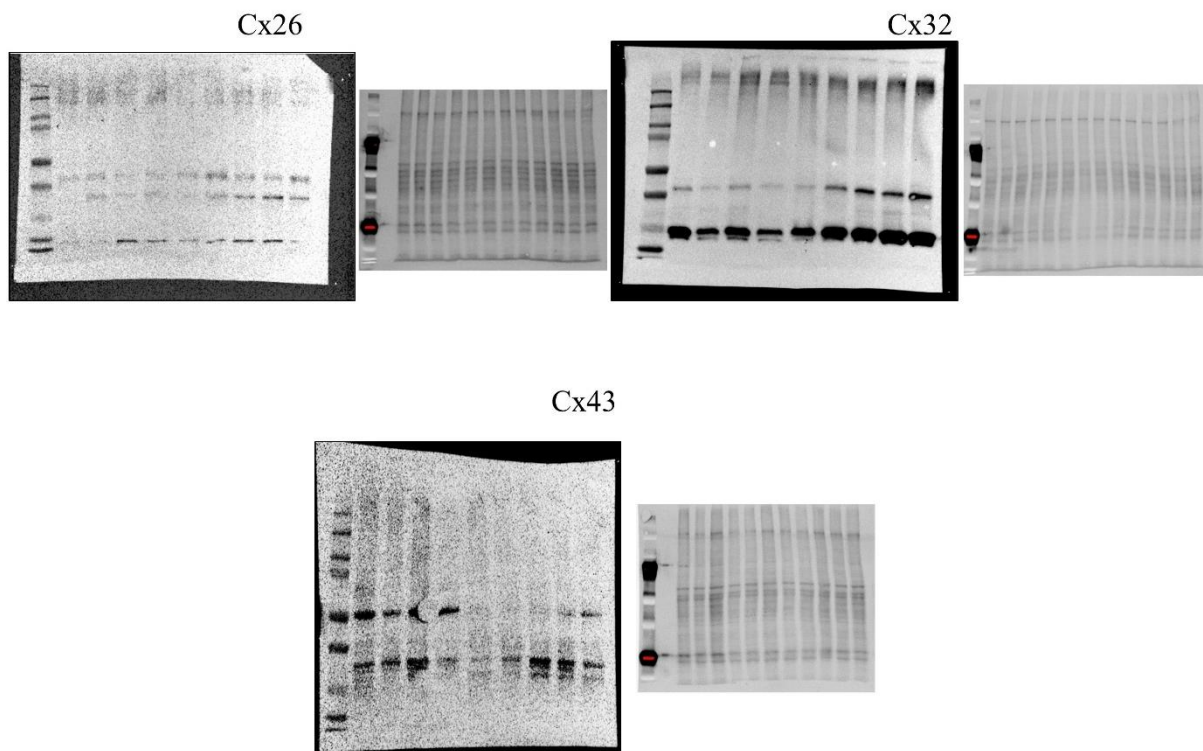

190

191

192

193

194

195

196

197 **Supplementary Figure 4. Full-length blots of Figure 2. Effects of TAT-Gap24 and TAT-**  
198 **Gap19 on connexin protein expression in liver.** Immunoblot analysis of Cx26 (21 kDa),  
199 Cx32 (27 kDa) and Cx43 (43 kDa) after separation and blotting, after which results were  
200 normalized to total protein loading.

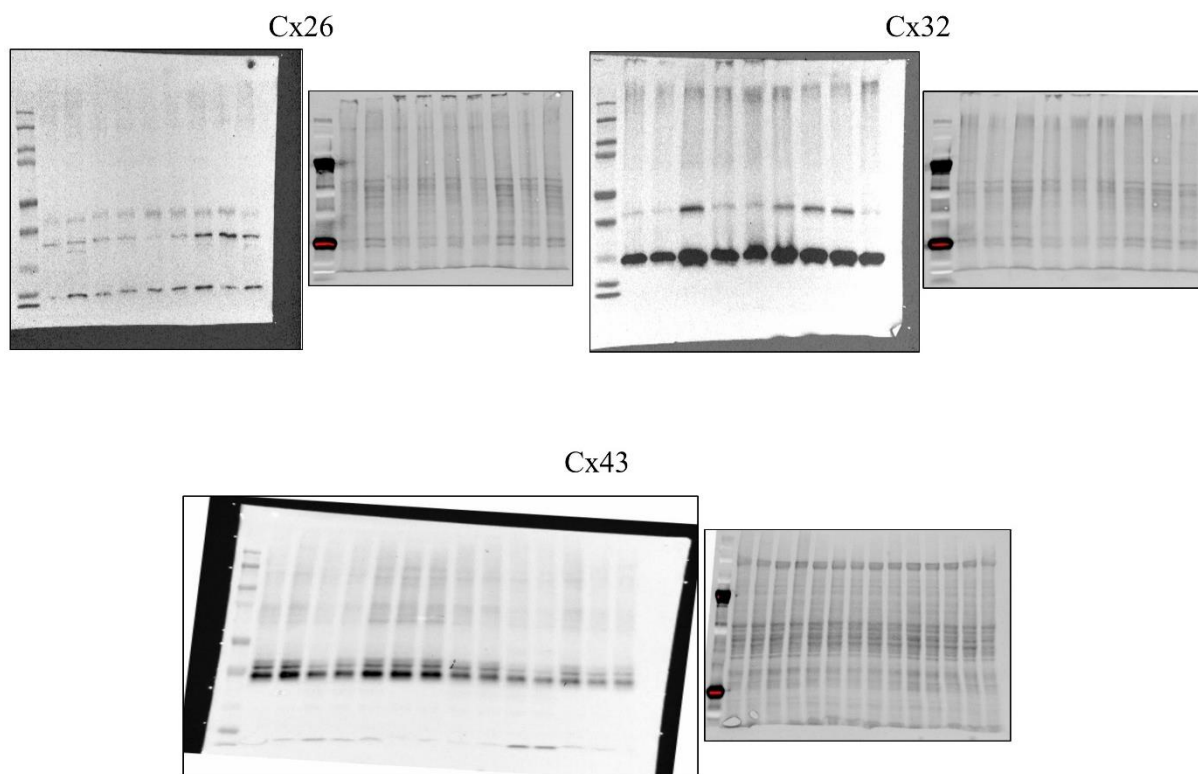

201

202

203

204

205

206

207

208 **Supplementary Figure 5. Full-length blots of Figure 6. Protein expression analysis of**  
209 **liver tissue of TAT-Gap24 and TAT-Gap19-treated NASH animals. Immunoblot analysis**  
210 **of CD36 (53 kDa), NADPH oxidase (65 kDa) and LY86 (24 kDa) after separation and**  
211 **blotting, after which results were normalized to total protein.**

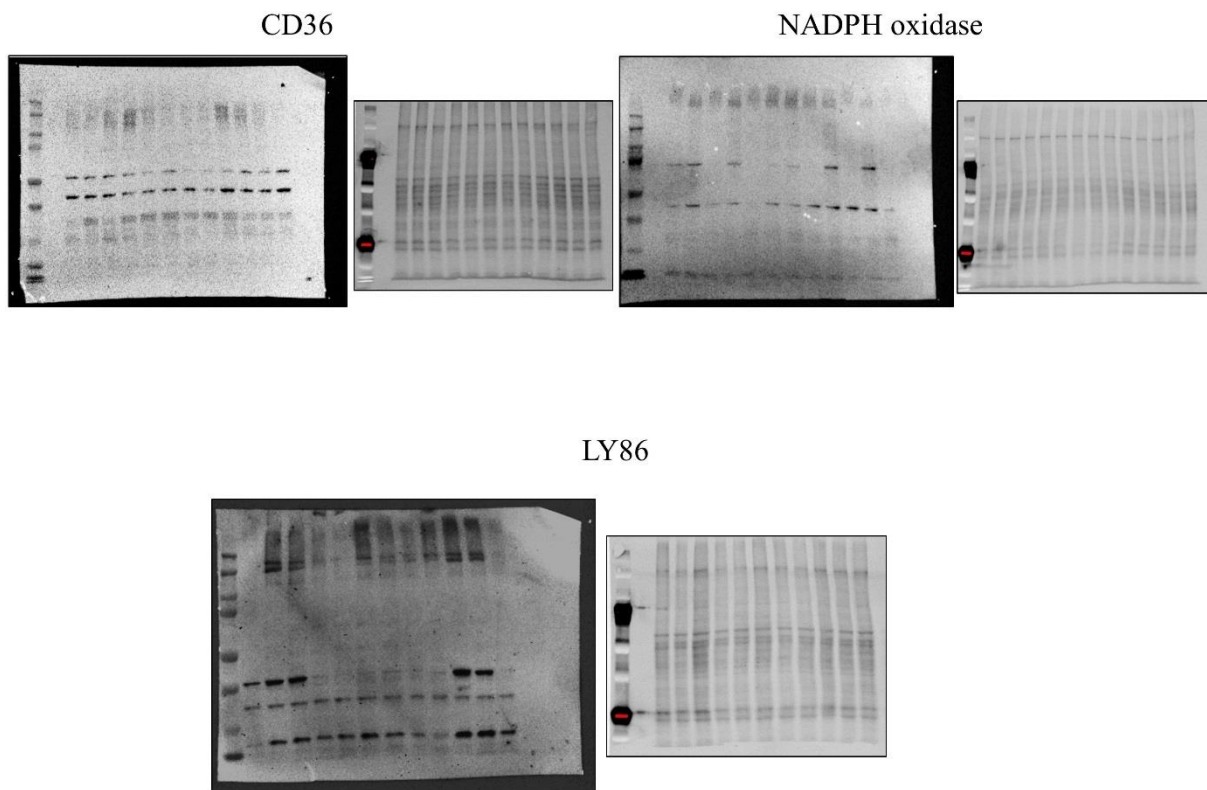

212
